# Supplementary material
Source: Springer Nature journal article supplement (https://www.springermedizin.de/resource/supplementary/12865_2012_511_MOESM1_ESM.pdf/9428154)

A

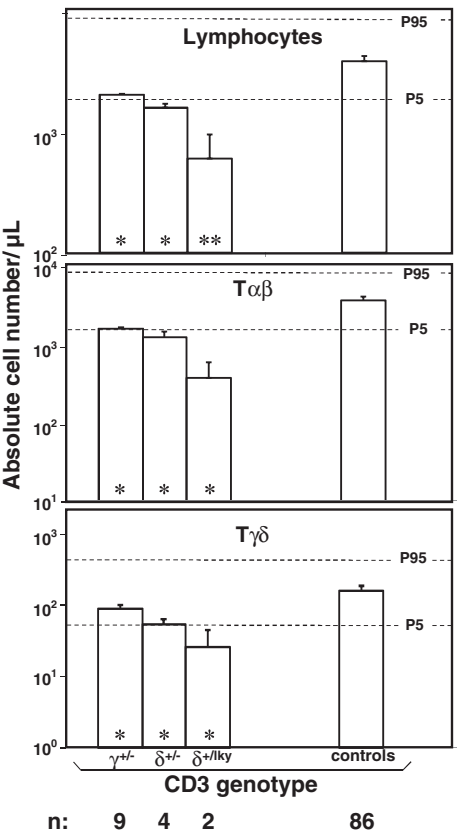

B

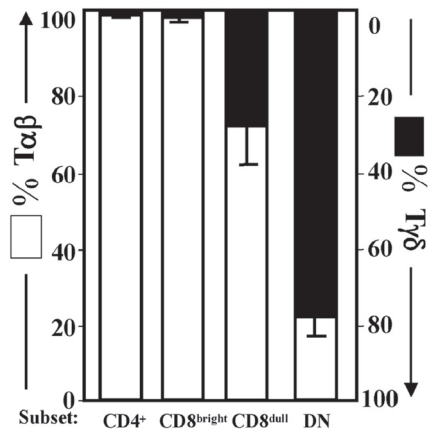

Supplement: MOESM1 [file 9428154]
